# Supplementary material
Source: PubMed Central journal article supplement (PMC6508871)
Supplement: NIHMS1525492-supplement-1.pdf [file NIHMS1525492-supplement-1.pdf]

**Supplemental Information**

**Dual RNA-Seq of Human Leprosy Lesions  
Identifies Bacterial Determinants Linked  
to Host Immune Response**

**Dennis J. Montoya, Priscila Andrade, Bruno J.A. Silva, Rosane M.B. Teles, Feiyang Ma, Bryan Bryson, Saheli Sadanand, Teia Noel, Jing Lu, Euzenir Sarno, Kristine B. Arnvig, Douglas Young, Ramanuj Lahiri, Diana L. Williams, Sarah Fortune, Barry R. Bloom, Matteo Pellegrini, and Robert L. Modlin**

|                                                                                                               | LL1         | LL2         | LL3         | LL4         | LL5         | LL6         | LL7         | LL8         | LL9         |
|---------------------------------------------------------------------------------------------------------------|-------------|-------------|-------------|-------------|-------------|-------------|-------------|-------------|-------------|
| <b>Total raw exonic reads</b>                                                                                 | 44,712,768  | 57,381,932  | 55,656,315  | 43,284,470  | 58,924,537  | 74,403,791  | 46,699,318  | 44,636,954  | 55,489,167  |
| <i>M. leprae</i> raw exonic reads                                                                             | 918,256     | 541,624     | 718,047     | 1,705,199   | 831,029     | 3,282,448   | 619,919     | 762,590     | 533,522     |
| <b>Human raw exonic reads</b>                                                                                 | 43,794,512  | 56,840,308  | 54,938,268  | 41,579,271  | 58,093,508  | 71,121,343  | 46,079,399  | 43,874,364  | 54,955,645  |
| <i>M. leprae</i> exonic coverage<br>((reads x 50bp)/sum of<br>length of all exons)                            | 18.3X       | 10.8X       | 14.3X       | 34.0X       | 16.6X       | 65.5X       | 12.4X       | 15.2X       | 10.6X       |
| <b>Percent <i>M. leprae</i> genes<br/>with ≥ 5 reads</b>                                                      | 96%         | 93%         | 94%         | 98%         | 96%         | 98%         | 93%         | 94%         | 92%         |
| <b>Total DESeq2 norm counts</b>                                                                               | 54,850,139  | 53,686,021  | 53,626,983  | 60,909,854  | 54,600,511  | 54,140,182  | 57,979,524  | 49,273,521  | 54,026,617  |
| <b>Human DESeq2 norm<br/>counts</b>                                                                           | 53,723,695  | 53,179,282  | 52,935,117  | 58,510,300  | 53,830,465  | 51,751,697  | 57,208,427  | 48,431,719  | 53,507,157  |
| <i>M. leprae</i> DESeq2 norm<br>counts                                                                        | 1,126,445   | 506,739     | 691,866     | 2,399,554   | 770,046     | 2,388,485   | 771,098     | 841,802     | 519,460     |
| <b>Human transcriptional<br/>abundance<br/>(Norm counts/gene length)</b>                                      | 9,719       | 12,807      | 12,923      | 24,013      | 17,262      | 11,787      | 17,071      | 10,691      | 13,900      |
| <i>M. leprae</i><br>transcriptional abundance<br>(Norm counts/gene length)                                    | 1,753       | 873         | 1,333       | 4,207       | 1,293       | 4,530       | 1,541       | 1,507       | 887         |
| <b><i>M. leprae</i> total RNA<br/>abundance<br/>(log2(<i>M. leprae</i>/<br/>(Human+<i>M. leprae</i>))+1))</b> | <b>0.15</b> | <b>0.06</b> | <b>0.09</b> | <b>0.15</b> | <b>0.07</b> | <b>0.28</b> | <b>0.08</b> | <b>0.12</b> | <b>0.06</b> |
| <b>Total <i>M. leprae</i> mRNA<br/>abundance<br/>(Norm counts/gene length)</b>                                | 1,080       | 419         | 503         | 1,927       | 684         | 1,854       | 523         | 699         | 429         |
| <b>23S (1343455-1343551)<br/>abundance<br/>(Norm counts/gene length)</b>                                      | 202         | 122         | 426         | 734         | 244         | 1,240       | 552         | 363         | 173         |
| <b><i>M. leprae</i> mRNA:rRNA<br/>log2((mRNA/23S)+1))</b>                                                     | <b>2.67</b> | <b>2.15</b> | <b>1.12</b> | <b>1.86</b> | <b>1.93</b> | <b>1.32</b> | <b>0.96</b> | <b>1.55</b> | <b>1.80</b> |

**Table S1. Related to Figure 1. Summary of in situ dual RNAseq of host-pathogen transcriptomes.** Raw read counts of exonic reads mapped to either the human or *M. leprae* genomes for each L-lep patient. Statistics of exome, gene coverage, and subsequent normalization also given. Specific values of the *M. leprae* abundance or mRNA:rRNA ratio are in bold font.

| RANK | Gene ID (MLBr4923) | DESeq norm counts | Transcriptional Abundance (norm counts/gene length) | Gene Name (MLTN) | Description                                                                                                                                | Type         |
|------|--------------------|-------------------|-----------------------------------------------------|------------------|--------------------------------------------------------------------------------------------------------------------------------------------|--------------|
| 1    | <b>MLBr_s02</b>    | <b>177956</b>     | <b>484.9</b>                                        | <b>ssr</b>       | <b>Transfer messenger RNA</b>                                                                                                              | <b>ncRNA</b> |
| 2    | <b>MLBr_r2</b>     | <b>117615</b>     | <b>450.6</b>                                        | <b>23S</b>       | <b>23S ribosomal RNA</b>                                                                                                                   | <b>ncRNA</b> |
| 3    | <b>MLBr_s02</b>    | <b>64270</b>      | <b>154.1</b>                                        | <b>RnaseP</b>    | <b>Ribonuclease P</b>                                                                                                                      | <b>ncRNA</b> |
| 4    | MLBr_00049         | 6147              | 21.4                                                | esxA             | Probable 6 kDa early secretory antigenic target homolog EsxA (ESAT-6-like protein) (L-ESAT)                                                | CDS          |
| 5    | MLBr_00050         | 4817              | 16.0                                                | esxB             | Possible 10 KDA culture filtrate antigen homolog EsxB (lhp) (cfp10)                                                                        | CDS          |
| 6    | MLBr_00406         | 17102             | 10.1                                                | espC             | ESX-1 SECRETION-ASSOCIATED PROTEIN ESPC                                                                                                    | CDS          |
| 7    | MLBr_01795         | 3240              | 8.7                                                 | hsp18            | 18 KDA antigen Hsp18 (HSP 16.7)                                                                                                            | CDS          |
| 8    | MLBr_00804         | 2326              | 9.2                                                 | whiB1            | Probable transcriptional regulatory protein WhiB-like WhiB1                                                                                | CDS          |
| 9    | MLBr_00198         | 3863              | 7.8                                                 | cspA             | Probable cold shock protein A CspA                                                                                                         | CDS          |
| 10   | MLBr_02526         | 1588              | 5.2                                                 | ML2526           | Conserved hypothetical protein (pseudogene)                                                                                                | CDS (pseudo) |
| 11   | MLBr_02686         | 446               | 4.9                                                 | ML2686c          | Conserved hypothetical protein (pseudogene)                                                                                                | CDS (pseudo) |
| 12   | MLBr_02400         | 1251              | 4.1                                                 | ML2400c          | PROBABLE CONSERVED TRANSMEMBRANE PROTEIN                                                                                                   | CDS          |
| 13   | MLBr_02042         | 2479              | 4.2                                                 | ahpC             | ALKYL HYDROPEROXIDE REDUCTASE C PROTEIN AHPC (ALKYL HYDROPEROXIDASE C)                                                                     | CDS          |
| 14   | MLBr_00317         | 1529              | 3.3                                                 | groEL2           | 65 kDa chaperonin 2 GroEL2 (Protein Cpn60-2) (groEL protein 2) (65 kDa antigen) (Heat shock protein 65) (Cell wall protein A) (Antigen A). | CDS          |
| 15   | MLBr_02135         | 3497              | 3.9                                                 | ML2135c          | possible transmembrane protein                                                                                                             | CDS          |
| 16   | MLBr_01746         | 3962              | 4.2                                                 | ML1746c          | Probable short-chain dehydrogenase/reductase (pseudogene)                                                                                  | CDS (pseudo) |
| 17   | MLBr_00405         | 4374              | 3.7                                                 | espA             | Conserved hypothetical protein                                                                                                             | CDS          |
| 18   | MLBr_00380         | 531               | 3.1                                                 | groES            | 10 kD chaperonin GroES (Protein Cpn10) (groES protein) (BCG-A heat shock protein) (10 kDa antigen)                                         | CDS          |
| 19   | MLBr_00738         | 5298              | 3.6                                                 | pstA2            | Phosphate-transport integral membrane ABC transporter PstA2 (pseudogene)                                                                   | CDS (pseudo) |
| 20   | MLBr_00551         | 877               | 3.0                                                 | ML0551c          | Putative methyltransferase                                                                                                                 | CDS          |
| 21   | MLBr_01852         | 930               | 3.1                                                 | ML1852c          | Probable conserved transmembrane protein (pseudogene)                                                                                      | CDS (pseudo) |
| 22   | MLBr_00410         | 928               | 3.1                                                 | PE3              | PE-family protein                                                                                                                          | CDS          |
| 23   | MLBr_01331         | 2504              | 2.5                                                 | tatA             | PROBABLE SEC-INDEPENDENT PROTEIN TRANSLOCASE                                                                                               | CDS          |
| 24   | MLBr_01420         | 954               | 2.7                                                 | ML1420           | MEMBRANE-BOUND PROTEIN TATA hypothetical protein                                                                                           | CDS          |
| 25   | MLBr_02038         | 3224              | 2.5                                                 | bfrA             | PROBABLE BACTERIOFERRITIN BFRA                                                                                                             | CDS          |
| 26   | MLBr_01961         | 727               | 2.5                                                 | rpmJ             | PROBABLE 50S RIBOSOMAL PROTEIN L36 RPMJ                                                                                                    | CDS          |
| 27   | MLBr_02563         | 281               | 2.4                                                 | fadE5            | PROBABLE ACYL-CoA DEHYDROGENASE FADE5                                                                                                      | CDS          |
| 28   | MLBr_00407         | 1178              | 2.3                                                 | espD             | ESX-1 SECRETION-ASSOCIATED PROTEIN ESPD                                                                                                    | CDS          |
| 29   | MLBr_00411         | 4420              | 2.6                                                 | ML0411           | serine-rich antigen                                                                                                                        | CDS          |
| 30   | MLBr_00938         | 1526              | 2.3                                                 | ML0938           | hypothetical protein                                                                                                                       | CDS          |

**Table S2. Related to Figure 2. Top 30 *M. leprae* genes expressed in L-lep skin lesions.** Most abundantly expressed *M. leprae* genes as calculated by mean expression across the nine L-lep samples divided by gene length. Noncoding RNA (ncRNA) genes are in bold font. Fractional transcriptional abundance calculated by divided the mean expression of gene by total abundance of all *M. leprae* genes.

A

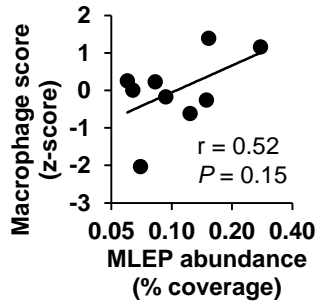

B

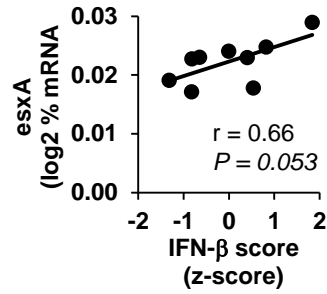

**Figure S1. Related to Figure 1 & Figure 3. Relationship of host macrophage abundance and type I interferon program to *M. leprae* expression.** (A) Correlation plot of *M. leprae* abundance against SaVanT macrophage signature score per L-lep patient. *P*-value by student's t-test ( $n = 9$ ). (B) Correlation plot of the host type I interferon SaVanT signature score versus the percent mRNA expression of *M. leprae* esxA per L-lep patient. *P*-value by student's t-test ( $n = 9$ ).

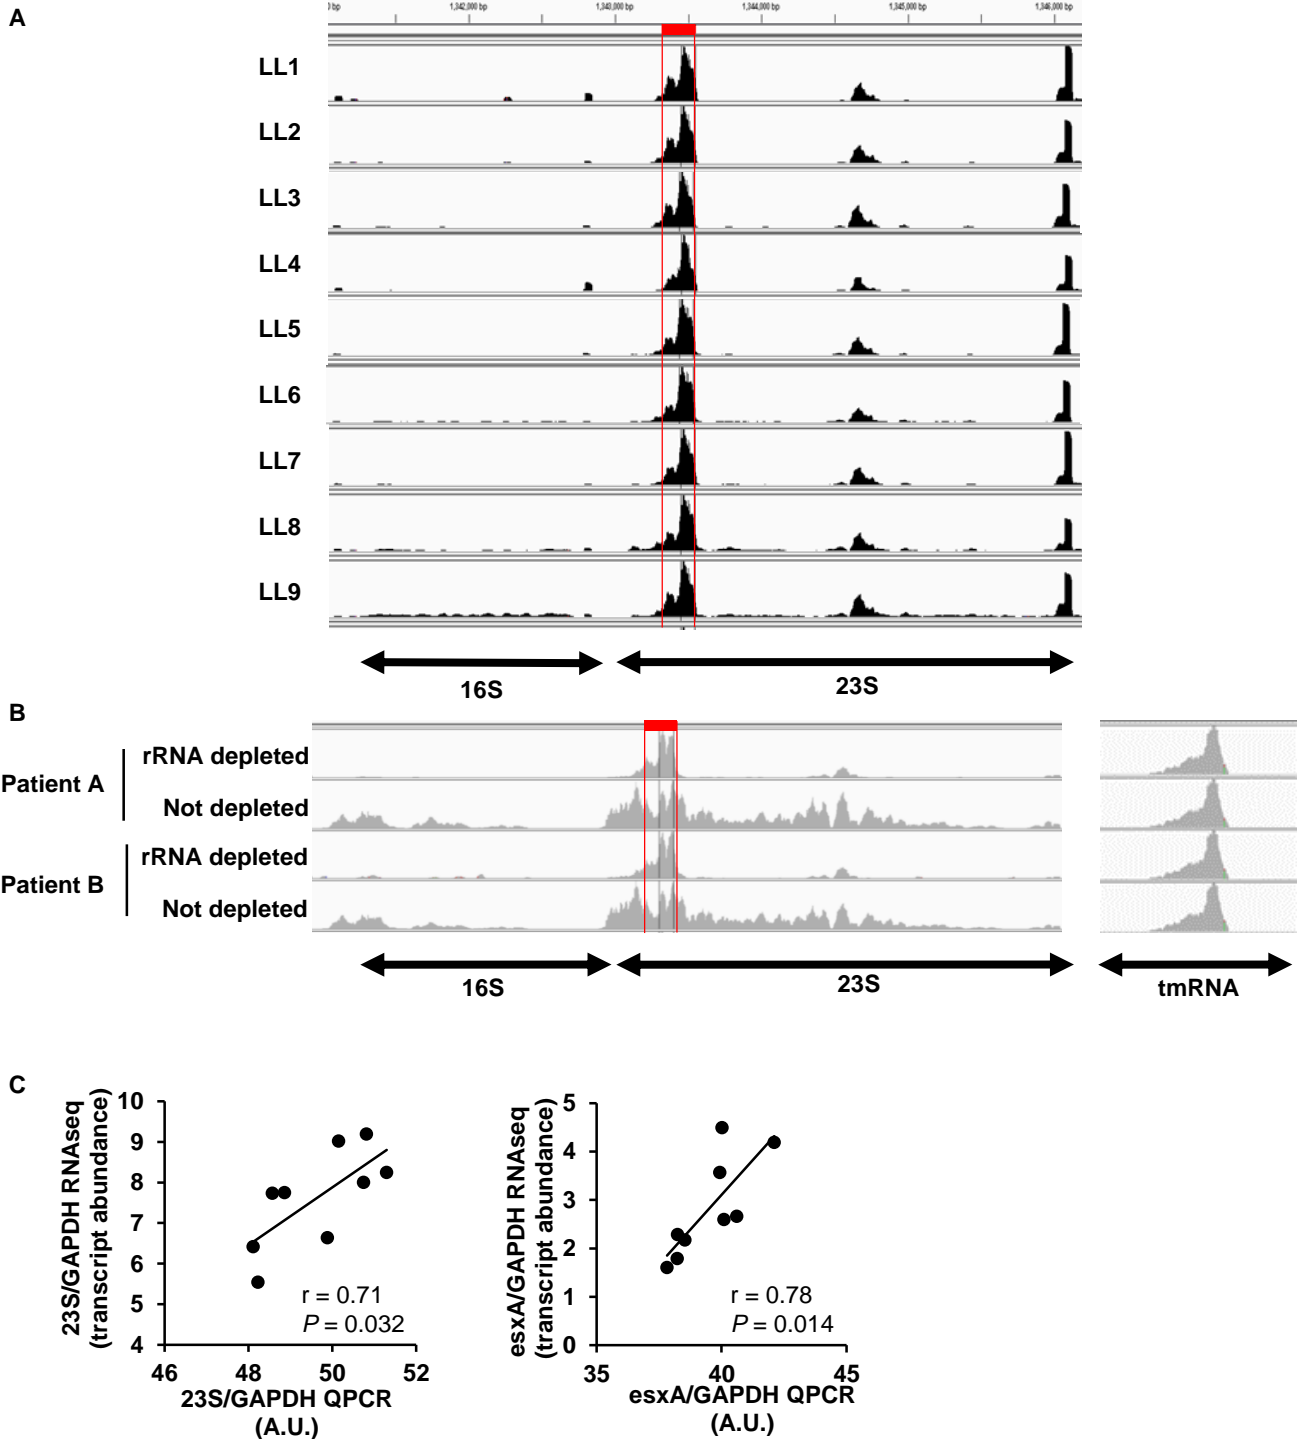

**Figure S2. Related to Figure 2. Read coverage of *M. leprae* ribosomal RNA locus. (A)** Dual RNAseq coverage of reads across 16S and 23S ribosomal RNA loci of *M. leprae*. Each Integrated Genome Browser track (IGV) autoscaled to each sample. Selected region for 23S rRNA quantitation highlighted in red. **(B)** RNA was extracted from two separate leprosy skin lesions, split into two aliquots, one depleted for bacterial rRNA by Ribozero while the other lacked depletion. Read coverage for rRNA locus shown with each IGV track autoscaled to each sample. **(C)** RNA from L-lep samples before rRNA depletion was converted into cDNA libraries. *M. leprae* 23S rRNA or *esxA* mRNA expression of undepleted cDNA assessed via QPCR, normalized to human GAPDH expression (x-axis) and compared to 23S/GAPDH or *esxA*/GAPDH RNAseq expression of rRNA depleted samples. *P*-value by student's *t*-test ( $n = 9$ ).

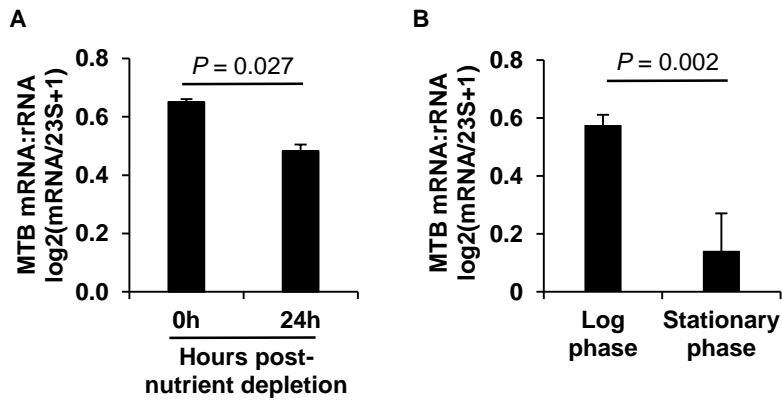

**Figure S3. Related to Figure 2. Ratio of mRNA:rRNA assessed in *Mycobacterium tuberculosis*.** (A) *M. tuberculosis* H37Rv was grown for 0 or 24h in axenic culture in PBS, without any additional nutrients. RNAseq was performed and mRNA:rRNA ratio of the total abundance of mRNA to the 23S rRNA was measured. Results shown as mean  $\pm$  s.e.m ( $n = 3$ ). (B) Similarly, *M. tuberculosis* H37Rv in log phase versus stationary phase RNAseq mRNA:rRNA ratio was compared. Results shown as mean  $\pm$  s.e.m ( $n = 3$ ).  $P$ -value by student's t-test.

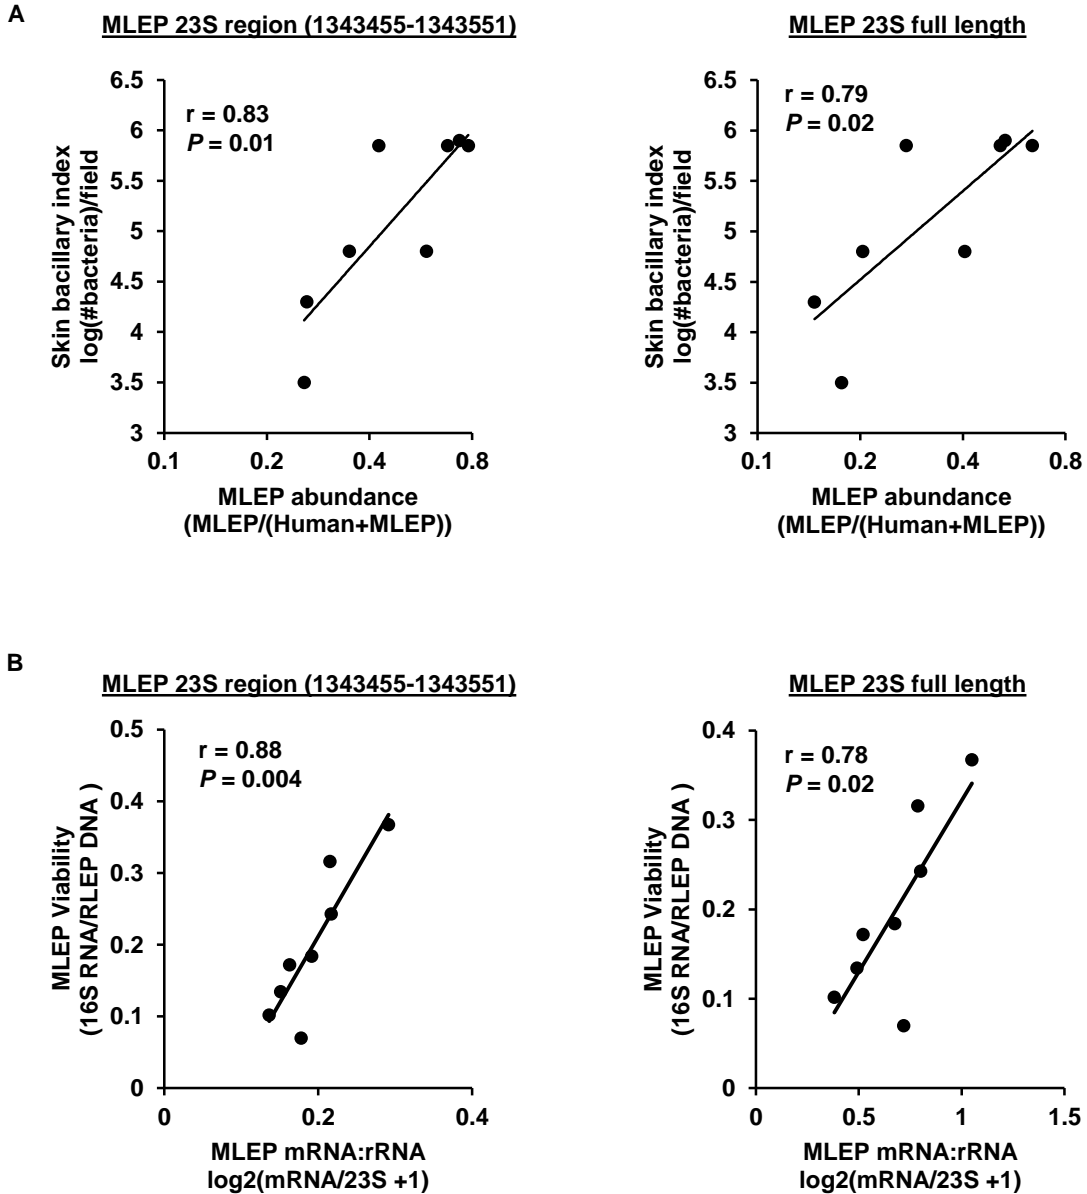

**Figure S4. Related to Figure 1 and Figure 2. Validation of *M. leprae* bacterial measures with current clinical standards.** An additional eight lepromatous patient lesions were sequenced by dual RNA sequencing method, however only human ribosomal was depleted. MLEP abundance (**A**) and MLEP transcriptional activity (**B**) calculated by quantifying the 23S rRNA abundance either by the 23S region (1343455-1343551) or using its full length, were correlated with the skin bacillary or *M. leprae* 16S RNA/RLEP DNA viability per patient, respectively. *P*-value by student's *t*-test ( $n = 8$ ).

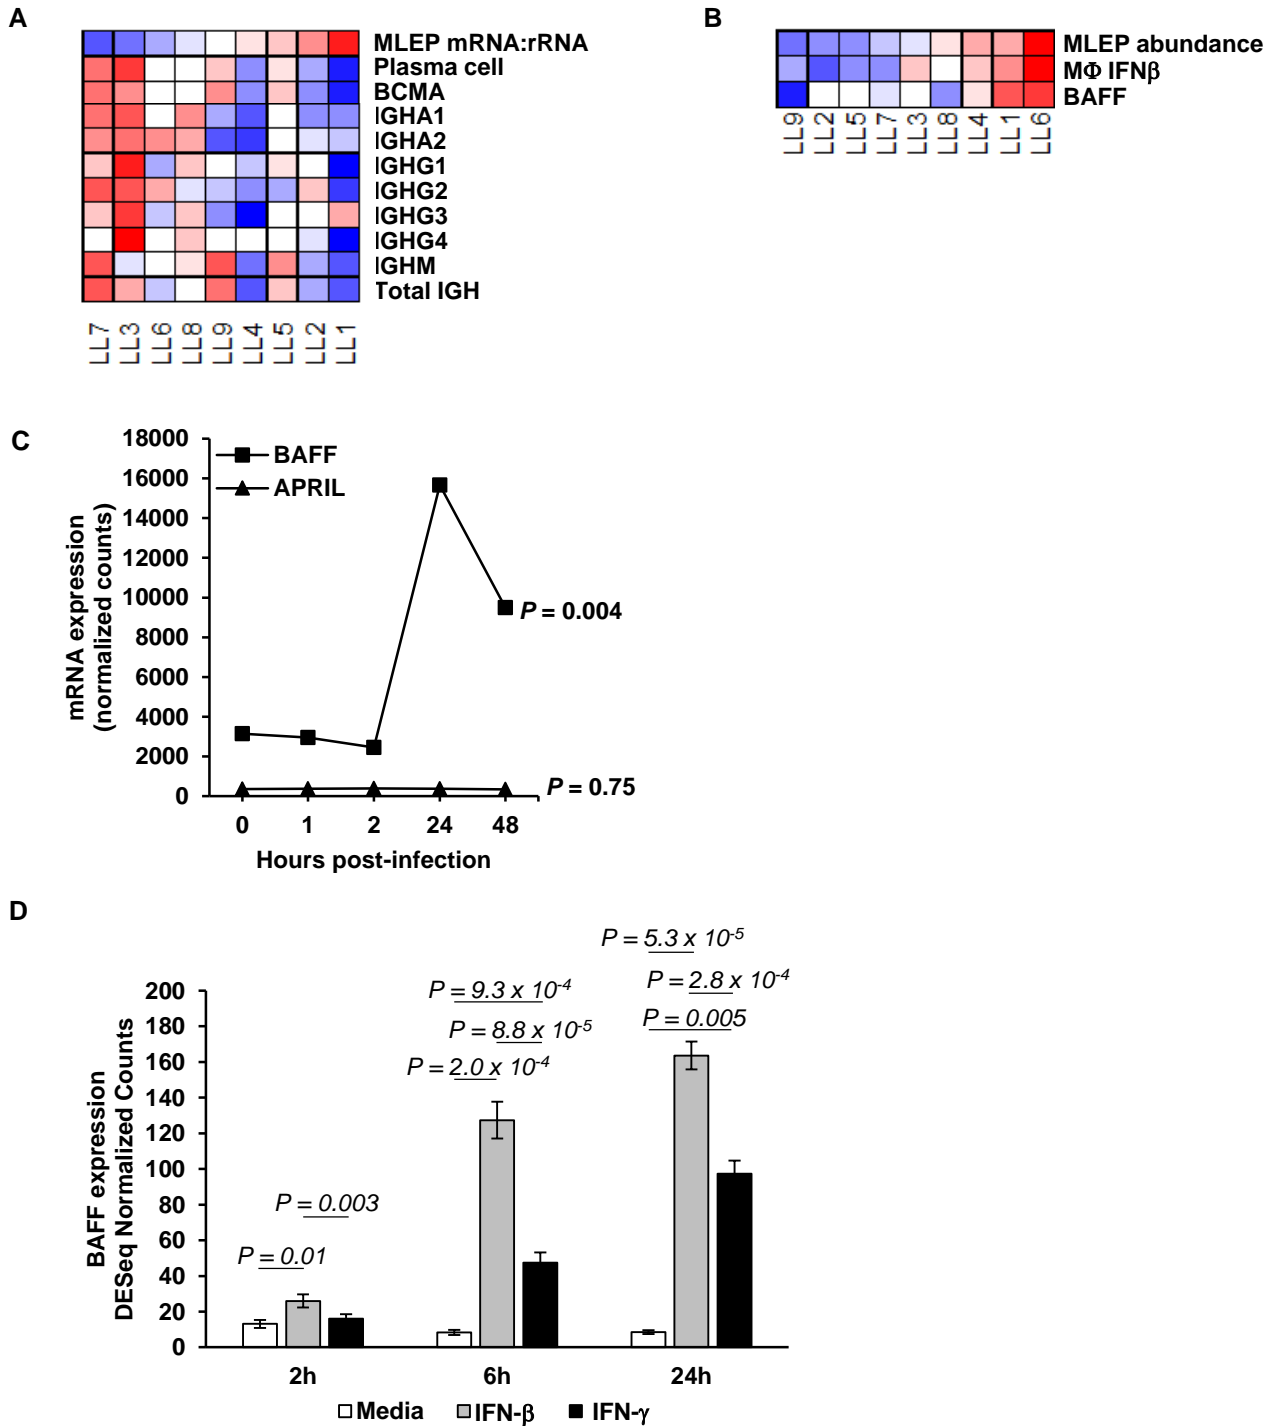

**Figure S5. Related to Figure 4. *M. leprae* correlation and direct effect on the host humoral immune response.** Heatmap of the expression human humoral immune components per each of the nine L-lep patients, ordered by *M. leprae* transcriptional activity (A) or *M. leprae* abundance (B). (C) Human M-CSF derived macrophages (MDMs) were infected at a multiplicity of infection of 10 with *M. leprae* derived from the footpad of *nu/nu*. At time indicated, RNA was extracted and RNAseq was performed. Data shown as normalized counts across timecourse. Bonferoni-adjusted *P*-value for change of gene expression one experiment over the five timepoints calculated by Wald test. (D) MDMs stimulated with IFN-β or IFN-γ for 2, 6, or 24h then RNAseq was performed. Data shown as BAFF mRNA normalized counts across timecourse. *P*-value ( $n = 5$ ) by paired student t-test.
